# Supplementary material for: The transcription factor HSFA7b controls thermomemory at the shoot apical meristem by regulating ethylene biosynthesis and signaling in Arabidopsis
Source: PubMed Central journal article supplement — Plant Commun. 2023 Nov 2;5(3):100743. doi: 10.1016/j.xplc.2023.100743 (PMC10943549; doi:10.1016/j.xplc.2023.100743), 2023-11-02
Supplement: mmc1.pdf [file mmc1.pdf]

**Plant Communications, Volume 5**

**Supplemental information**

**The transcription factor HSFA7b controls thermomemory at the shoot apical meristem by regulating ethylene biosynthesis and signaling in *Arabidopsis***

**Sheeba John, Federico Apelt, Amit Kumar, Ivan F. Acosta, Dominik Bents, Maria Grazia Annunziata, Franziska Fichtner, Caroline Gutjahr, Bernd Mueller-Roeber, and Justyna J. Olas**

**Supplementary Information:**

**Transcription factor HSFA7b controls thermomemory at the shoot apical meristem by regulating ethylene biosynthesis and signaling in Arabidopsis**

Sheeba John, Federico Apelt, Amit Kumar, Ivan F. Acosta, Dominik Bents, Maria Grazia Annunziata, Franziska Fichtner, Caroline Gutjahr, Bernd Mueller-Roeber, Justyna Jadwiga Olas

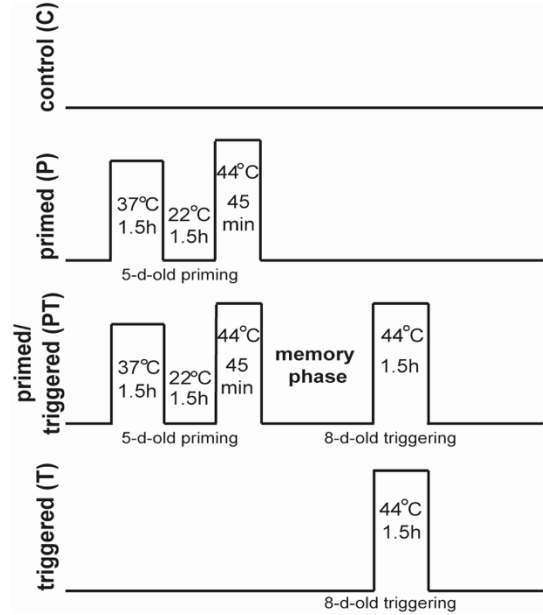

**Supplemental Figure 1. Schematic representation of the thermomemory assay.** Five-day-old seedlings grown in MS medium with 1% sucrose were used for the experiments. Seedlings that were not subjected to any HS treatment were treated as control (C). Primed (P) seedlings were subjected to a moderate HS treatment called priming (37 °C for 1.5 h followed by 22 °C for 1.5 h, and 44 °C for 45 min). The primed and triggered (PT) seedlings were subjected to priming followed by a 3-day memory/recovery phase, and then subjected to a second triggering HS. The triggered seedlings (T) were directly subjected to triggering on day 8, without prior priming treatment. Time is given in hours (h).



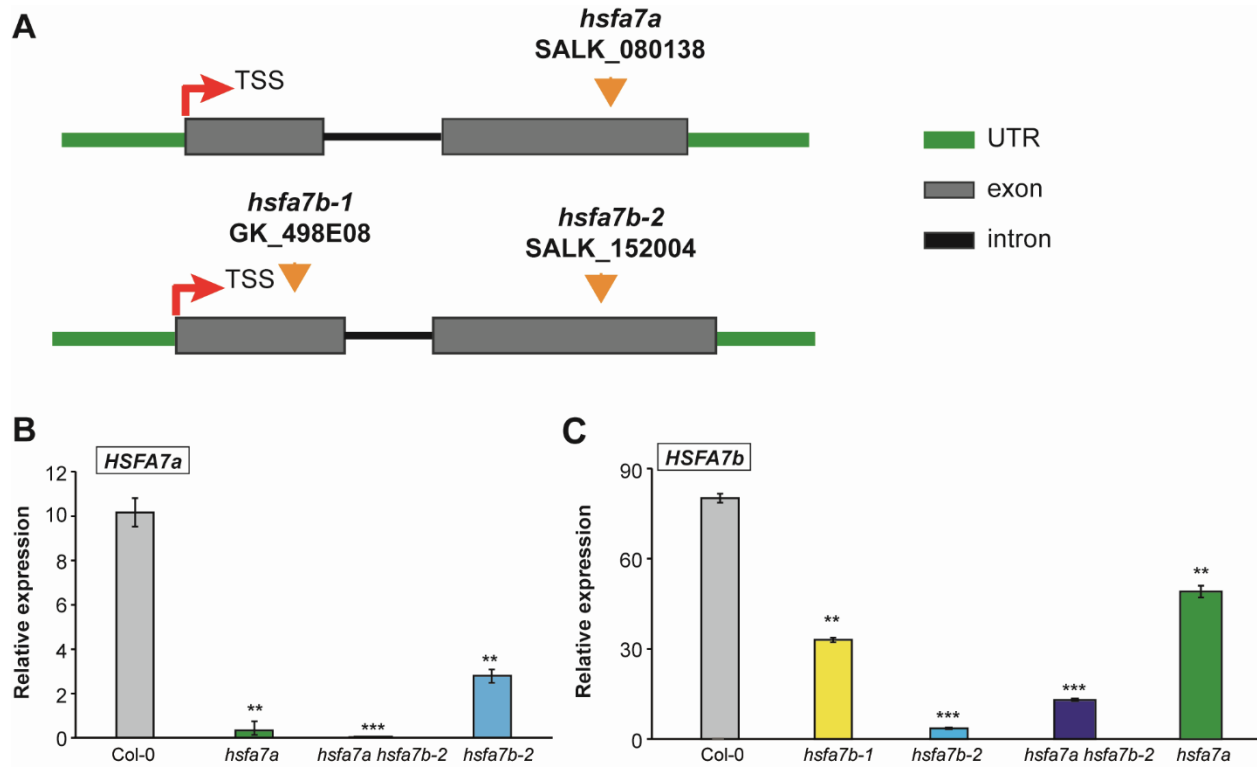

**Supplemental Figure 3. Characterization of *hsfa7a* and *hsfa7b* mutants.** (A) Schematic representation of the *hsfa7a*, *hsfa7b-1*, and *hsfa7b-2* mutants depicting the positions of T-DNA insertions. The green boxes represent the 5' and 3' UTRs, the black lines represent introns and the grey boxes represent exons. The red arrow represents the transcription start site (TSS). (B) The expression level of *HSFA7a* and *HSFA7b* measured in 5-day-old Col-0, *hsfa7a*, *hsfa7b-1*, *hsfa7b-2*, *hsfa7a hsfA7b-2*, and *hsfa7a* mutant plants at 2 h after priming. Error bars indicate s.d. ( $n = 3$ ). Asterisks indicate statistically significant differences (Student  $t$ -test: \*\* $P \leq 0.01$ ; \*\*\* $P \leq 0.001$ ) compared to Col-0 under the same conditions.

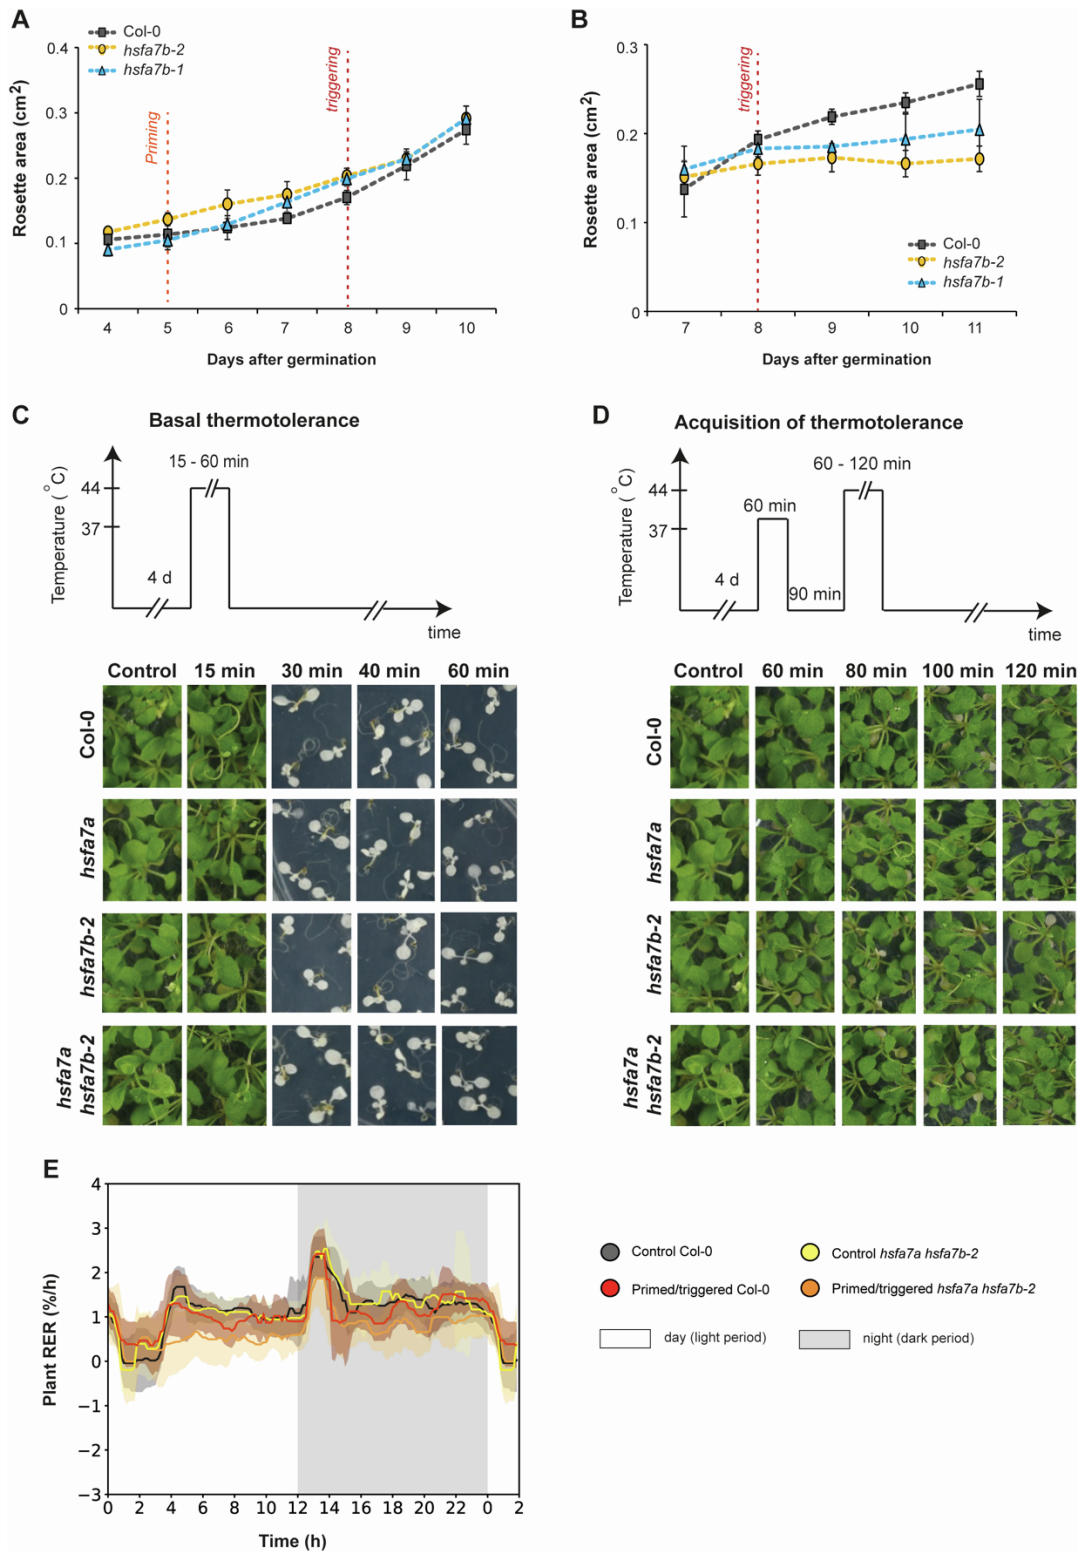

**Supplemental Figure 4. Analyses of rosette area, basal thermotolerance, acquisition of thermotolerance, and diurnal relative expansion rate (RER).** (A, B) Rosette area of (A) control and (B) primed/triggered (PT) Col-0, *hsfa7b-1*, and *hsfa7b-2* mutant plants analyzed during thermoprimering. (C) Basal thermotolerance and (D) acquisition of thermotolerance of Col-0,

*hsfa7a*, *hsfa7b-2*, and *hsfa7a hsfa7b-2* mutant plants. **(E)** Time-resolved RER averaged over seven sequential 24 h periods of control and PT Col-0 wild-type and *hsfa7a hsfa7b-2* mutant plants measured using an 3D imaging system.

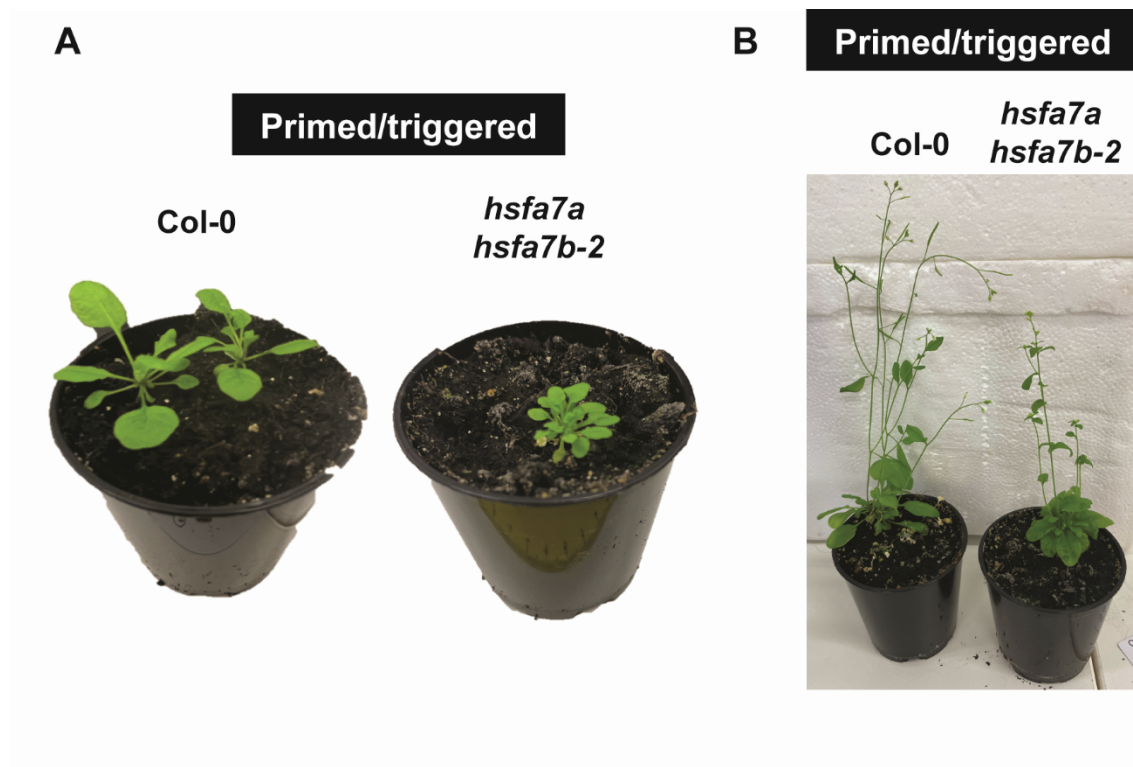

**Supplemental Figure 5.** The phenotype of primed/triggered Col-0 wild-type and *hsfa7a hsfA7b-2* mutant plants grown in long day (16 h light /8 h darkness) photoperiod. Images were taken at (A) 21 days after germination (bolting time for Col-0) and (B) 55 days after germination.



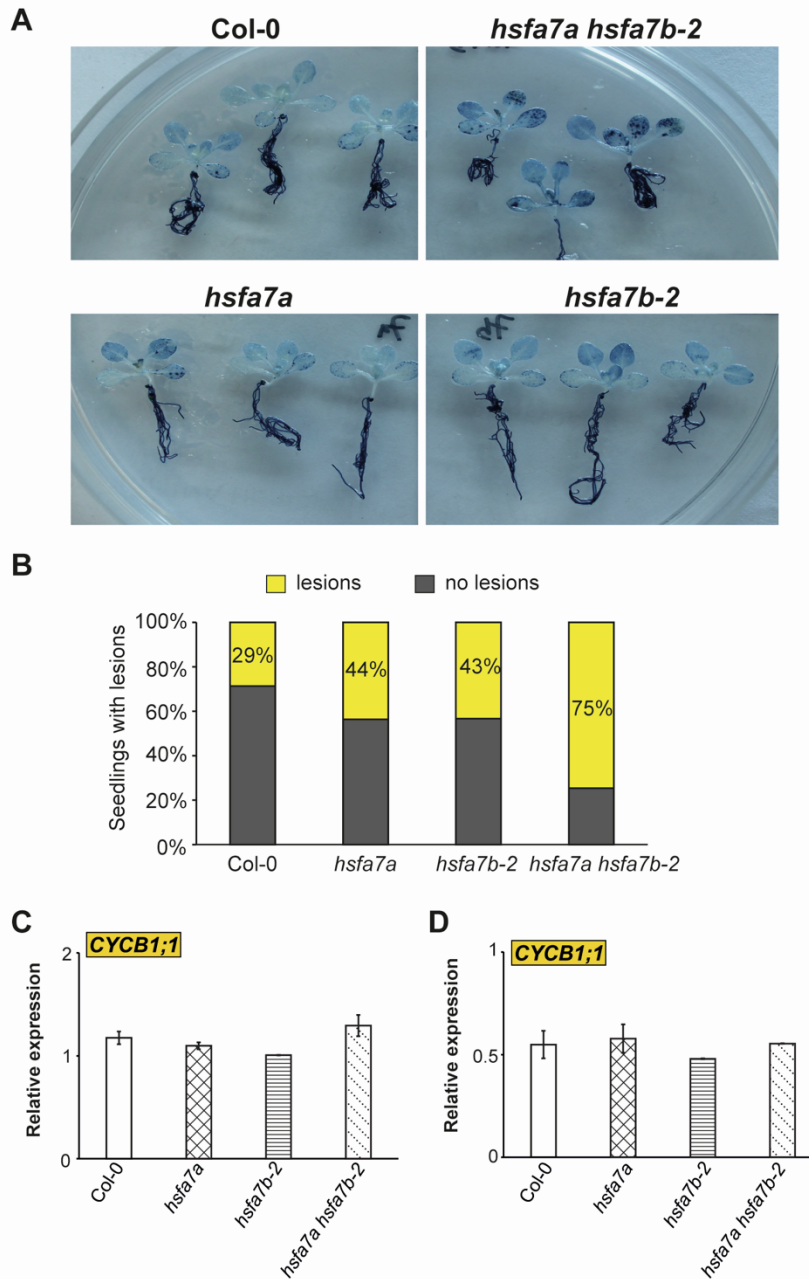

**Supplemental Figure 6. Analyses of cell death and cell cycle activity.** (A) Trypan Blue staining for cell death in primed/triggered (PT) Col-0, *hsf7a*, *hsf7b-2*, and *hsf7a hsf7b-2* mutants at 24 h after triggering treatment. (B) Percentage of PT Col-0, *hsf7a*, *hsf7b-2*, and *hsf7a hsf7b-2* seedlings with lesions. (C, D) Expression level of *CYCLIN B1;1* (*CYCB1;1*) in (C) control and (D) primed Col-0, *hsf7a*, *hsf7b-2*, and *hsf7a hsf7b-2* seedlings at 0.5 h after triggering stress. Error bars indicate s.d. ( $n = 3$ ).



*hsfa7a*/ 0.5 h) which was removed for further analysis. Heat map and PCA plots were generated with normalized expression values generated by applying variance stabilizing transformation (VST) using DESeq2.

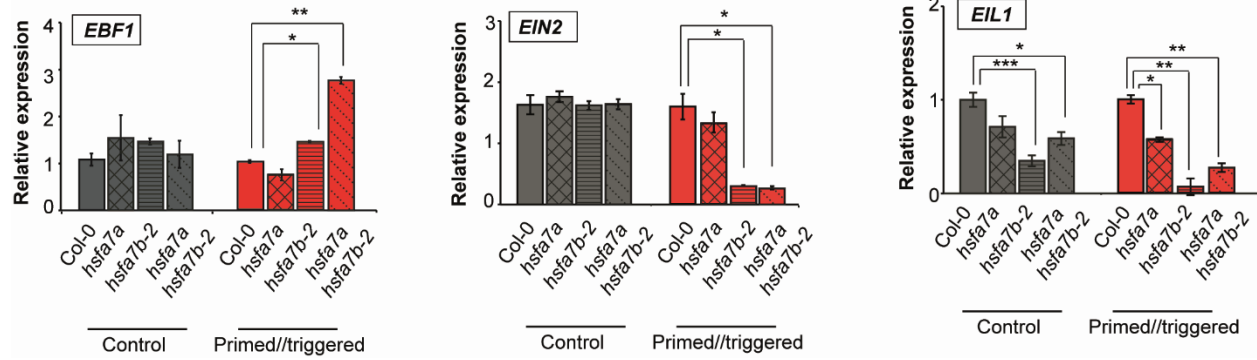

**Supplemental Figure 8. Expression of ethylene response gene at the shoot apical meristem (SAM) during thermopriming.** (A-C) The expression level of *EIN3-BINDING F BOX PROTEIN 1* (*EBF1*), *ETHYLENE INSENSITIVE 2* (*EIN2*), and *ETHYLENE-INSENSITIVE3-LIKE 1* (*EIL1*) analyzed at the SAM of control and primed/triggered Col-0, *hsfa7a*, *hsfa7b-2*, and *hsfa7a hsfA7b-2* plants at 0.5 h after triggering (72 h after priming). Error bars represent s.d. ( $n = 3$ ). Asterisks indicate statistically significant difference (Student's *t*-test,  $*P \leq 0.05$ ,  $**P \leq 0.01$ , and  $***P \leq 0.001$ ) compared to Col-0 under the same condition.

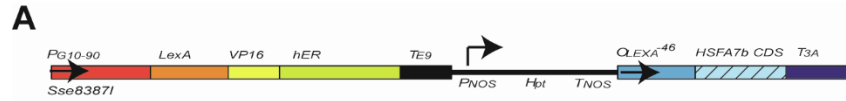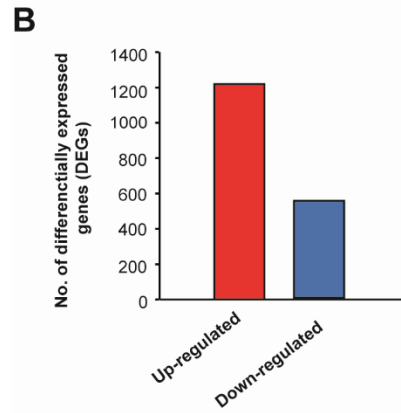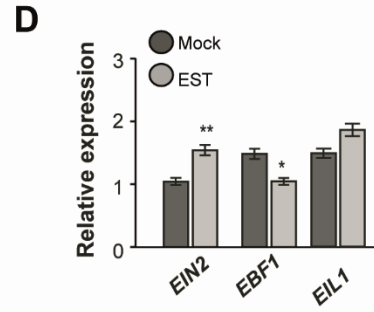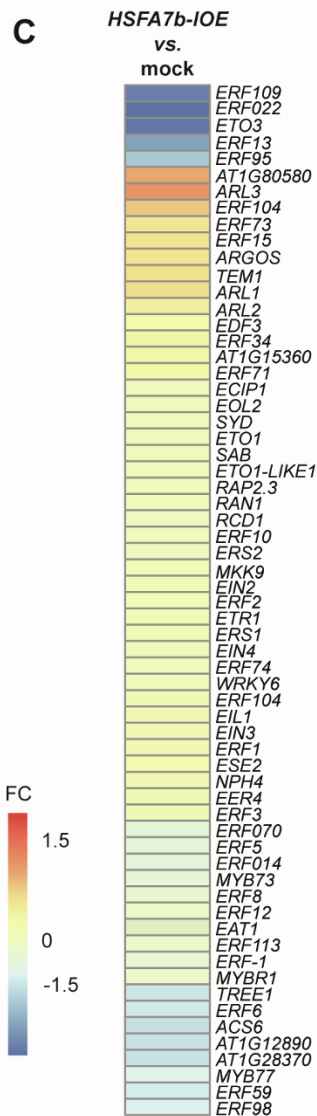

**Supplemental Figure 9. *HSFA7b-IOE* transgenic line.** (A) *HSFA7b-IOE* construct was generated by inserting the *HSFA7b* coding sequence into the XVE vector (Zuo *et al.*, 2000). Black arrows indicate the direction of the transcription. Abbreviations:  $P_{G10-90}$ , a synthetic promoter controlling *XVE* expression; *LexA*, the transcriptional activation domain of *V16*; *hER*, human estrogen receptor; *TE9*, *rbcS E9* poly(A) addition sequence; *Pnos*, nopaline synthase promoter; *Hpt*, hygromycin phosphotransferase II coding sequence; *Tnos*, nopaline synthase poly(A) addition sequence; *OLexA*, eight copies of the *LexA* operator sequence; *HSFA7b CSD*, *HSFA7b* coding sequence;  $T_{3A}$ , *rbcS3A* poly(A) addition sequence. (B) Number of differentially expressed up- (red) and down-regulated genes in *HSFA7b-IOE*. Note that samples were harvested 16 h after  $\beta$ -estradiol induction. (C) Heat map showing the log<sub>2</sub> fold change (log<sub>2</sub> FC) of the expression of ethylene-related up-regulated (red) or down-regulated (blue) genes in *HSFA7b-IOE* compared to mock-treated plants at 16 h after estradiol induction. (D) The expression level of *EIN3-BINDING F BOX PROTEIN 1 (EBF1)*, *ETHYLENE INSENSITIVE 2 (EIN2)*, and *ETHYLENE-INSENSITIVE3-LIKE 1 (EIL1)* in  $\beta$ -estradiol (EST)- and mock-treated *HSFA7b-IOE* plants. Error bars represent s.d. ( $n = 3$ ). Asterisks indicate statistically significant difference (Student's *t*-test,  $*P \leq 0.05$  and  $**P \leq 0.01$ ) compared to mock treatment (D).

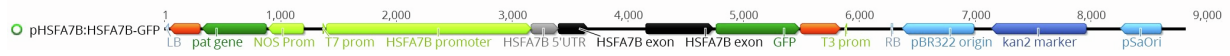

**Supplemental Figure 10. *pHSF7b:HSFA7b:GFP* construct.** *pHSF7b:HSFA7b:GFP* was generated by cloning the *HSFA7b* promoter (2 kb) and coding sequence (without stop codon) fused to GFP using the pGREENII 0229 vector (Hellens *et al.*, 2000).

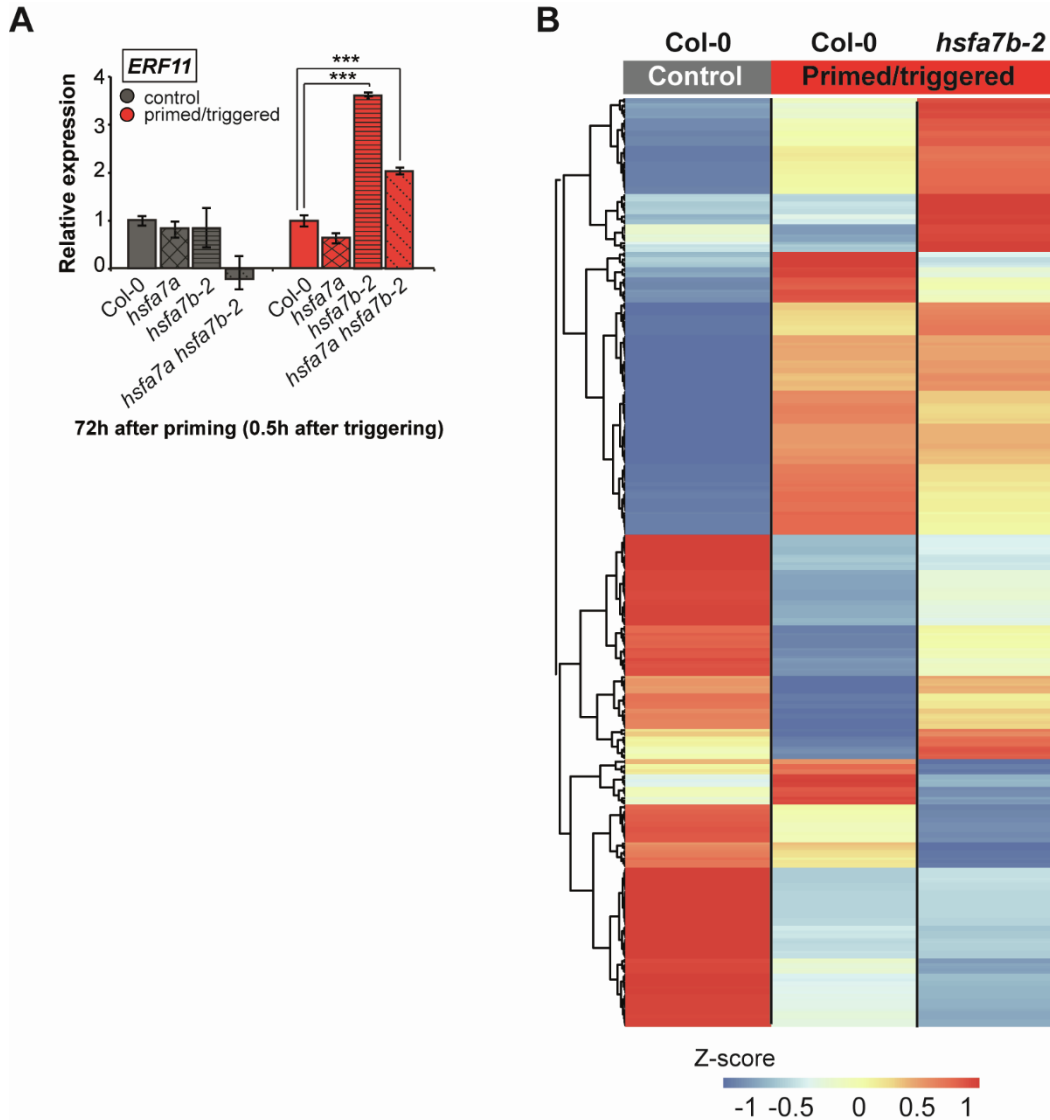

**Supplemental Figure 11. Expression of ethylene-related genes is affected in the absence of functional HSFA7a/b proteins.** (A) Expression of *ETHYLENE RESPONSIVE FACTOR 11* (*ERF11*) at the shoot apical meristem of Col-0 and *hsfa7a/b* mutant plants at 0.5 h after triggering (72 h after priming). Error bars represent s.d. ( $n = 3$ ). Asterisks indicate a statistically significant difference (Student's  $t$ -test,  $***P \leq 0.001$ ) compared to Col-0 under the same condition. (B) Heat map depicting relative expression (Z-score normalized) of ethylene-related genes that have been reported as direct targets of EIN3 in the Col-0 control and primed/triggered Col-0, and *hsfa7b-2* shoot apices.



**Supplemental Table 1.** Number of significantly changed genes with  $\log_2$  FC > |1.5|.

|                                                               | <b>0.5 h after priming</b> | <b>0.5 h after triggering<br/>(72 h after priming)</b> |
|---------------------------------------------------------------|----------------------------|--------------------------------------------------------|
| <b>DEGs: significant</b>                                      |                            |                                                        |
| Col-0 (P) vs. Col-0 (C)                                       | 12343 (6347↓; 5996↑)       | NA                                                     |
| <i>hsfa7a</i> (P) vs. Col-0 (P)                               | 1406 (717↓; 689↑)          | NA                                                     |
| <i>hsfa7b-2</i> (P) vs. Col-0 (P)                             | 3206 (1688↓; 1518↑)        | NA                                                     |
| <i>hsfa7a hsfa7b-2</i> (P) vs. Col-0 (P)                      | 810 (529↓; 281↑)           | NA                                                     |
| Col-0 (PT) vs. Col-0 (C)                                      | -                          | 9845 (5030↓; 4815↑)                                    |
| <i>hsfa7a</i> (PT) vs. Col-0 (PT)                             | -                          | 274 (161↓; 113↑)                                       |
| <i>hsfa7b-2</i> (PT) vs. Col-0 (PT)                           | -                          | 153 (67↓; 86↑)                                         |
| <i>hsfa7a hsfa7b-2</i> (PT) vs. Col-0 (PT)                    | -                          | 1062 (518↓; 544↑)                                      |
| <b>DEGs: significant and <math>\log_2</math>FC &gt;  1.5 </b> |                            |                                                        |
| Col-0 (P) vs. Col-0 (C)                                       | 8001 (3758↓; 4243↑)        | NA                                                     |
| <i>hsfa7a</i> (P) vs. Col-0 (P)                               | 668 (284↓; 384↑)           | NA                                                     |
| <i>hsfa7b-2</i> (P) vs. Col-0 (P)                             | 1042 (481↓; 561↑)          | NA                                                     |
| <i>hsfa7a hsfa7b-2</i> (P) vs. Col-0 (P)                      | 204 (162↓; 42↑)            | NA                                                     |
| Col-0 (PT) vs. Col-0 (C)                                      | -                          | 4366 (1576 ↓; 2790↑)                                   |
| <i>hsfa7a</i> (PT) vs. Col-0 (PT)                             | -                          | 63 (26↓; 37↑)                                          |
| <i>hsfa7b-2</i> (PT) vs. Col-0 (PT)                           | -                          | 53 (21↓; 32↑)                                          |
| <i>hsfa7a hsfa7b-2</i> (PT) vs. Col-0 (PT)                    | -                          | 252 (26↓; 226↑)                                        |

Abbreviations: C, control; P, primed; PT, primed and triggered; T, triggered; NA, not applicable. Downward directed arrows (↓) indicate downregulated genes; upward directed arrows (↑) indicate upregulated genes.

**Supplemental Table 2.** Oligonucleotides used in this study.

| <b>Gene (AGI)</b>                        | <b>Oligonucleotide</b> | <b>Sequence (5'→3')</b>  |
|------------------------------------------|------------------------|--------------------------|
| <b>Oligonucleotides used for cloning</b> |                        |                          |
| <i>ERF1A</i>                             | ERF1A_F                | ATGTCGATGACGGCGGATTC     |
| <i>AT4G17500</i>                         | ERF1A_R                | TTATAAAACCAATAAACGATCGCC |
| <i>HSFA7a</i>                            | HSFA7a_F               | ATGATGAACCCGTTTCTCCC     |
| <i>AT3G51910</i>                         | HSFA7a_R               | TTAGGAGGTGGAAGCCAAACTC   |
| <i>HSFA7b</i>                            | HSFA7b_F               | ATGGACCCGTCGTCAAGCTCC    |
| <i>AT3G63350</i>                         | HSFA7b_R               | CTAATCTTGCTTCACATTCCG    |
| <i>HSP17.8</i>                           | HSP17.8_F              | ATGTCGCTTATTCCAAGCTTC    |
| <i>AT1G07400</i>                         | HSP17.8_R              | TTAGCCAGAGATATCAATAGAC   |
| <b>Oligonucleotides used for qRT-PCR</b> |                        |                          |
| <i>ACS6</i>                              | ACS6_qRT_F             | GCTGCTTCTGCAATCTACGC     |
| <i>AT4G11280</i>                         | ACS6_qRT_R             | ATACGCCAACAGCTTTGCAC     |
| <i>ACS7</i>                              | ACS7_qRT_F             | GAAAGGGAACGCAGGGCTAT     |
| <i>AT4G26200</i>                         | ACS7_qRT_R             | CCTAAACCATCCGACCTCCG     |
| <i>ACS11</i>                             | ACS11_qRT_F            | CCTGAGTTCACCAGCGTTCT     |
| <i>AT4G08040</i>                         | ACS11_qRT_R            | CGGCTGACACCACTTTCTCA     |
| <i>CYCB1;1</i>                           | CYCB1;1_qRT_F          | GCTGCTTCTGCAATCTACGC     |
| <i>AT4G37490</i>                         | CYCB1;1_qRT_R          | ATACGCCAACAGCTTTGCAC     |
| <i>HSFA7a</i>                            | HSFA7a_qRT_F           | ACCACCACCACAACCAATGGAG   |
| <i>AT3G51910</i>                         | HSFA7a_qRT_R           | TCTTGTCAGAAATGGAGGTGGAG  |
| <i>HSFA7b</i>                            | HSFA7b_qRT_F           | ATGGAGGGATTGCAGGAAGCAG   |
| <i>AT3G63350</i>                         | HSFA7b_qRT_R           | TGGATCACCAACCATCTCGAACG  |
| <i>HSFA2</i>                             | HSFA2_qRT_F            | GCAGCGTTGGATGTGAAAGTGG   |
| <i>AT2G26150</i>                         | HSFA2_qRT_R            | TTGGCTGTCCCAATCCAAAGGC   |
| <i>EBF1</i>                              | EBF1_qRT_F             | CCCTCCAAGCAAGAGATCAC     |
| <i>AT2G25490</i>                         | EBF1_qRT_R             | AACACCCTTCACAATCATCAC    |
| <i>EBF2</i>                              | EBF2_qRT_F             | CCCGATGATTGAAAACTTGAC    |
| <i>AT5G25350</i>                         | EBF2_qRT_R             | AACCCTCATTCCCAACACC      |
| <i>ERF1A</i>                             | ERF1A_qRT_F            | TTGCGGCGGAGATTAGAGAC     |
| <i>AT4G17500</i>                         | ERF1A_qRT_R            | ATTCAACAAAGCGCGGGAAC     |
| <i>ERF104</i>                            | ERF104_qRT_F           | AGAGAGGCACTACAGGGGAG     |
| <i>AT5G61600</i>                         | ERF104_qRT_R           | GTGTCGTAAGTCCCAAGCCA     |
| <i>EIN2</i>                              | EIN2_qRT_F             | AATGACACCGTGCTTTTGCC     |
| <i>AT5G03280</i>                         | EIN2_qRT_R             | TGACTGCGGTTGTGCATTTG     |
| <i>EIN3</i>                              | EIN3_qRT_F             | TGTCTGGTGAAGTTGCTCG      |
| <i>AT3G20770</i>                         | EIN3_qRT_R             | ATTCCGAGTTTCTGCTGGG      |
| <i>EIL1</i>                              | EIL1_qRT_F             | AAGCAACCAAACGCCTCCTA     |

|                      |              |                             |
|----------------------|--------------|-----------------------------|
| <i>AT2G27050</i>     | EIL1_qRT_R   | TTAACCCCGTTGTTTCGTC         |
| <b><i>EOL1</i></b>   | EOL1_qRT_F   | GCTACTACTGCTTCTTCCCC        |
| <i>AT3G42660</i>     | EOL1_qRT_R   | CAACAACGCTGAAATCTCTAA C     |
| <b><i>ETO1</i></b>   | ETO1_qRT_F   | TGGCAACACAACCTTGACCCT       |
| <i>AT3G51770</i>     | ETO1_qRT_R   | ATATCGCCCTCGAAAGCTCG        |
| <b><i>TUB2</i></b>   | TUB_qRT_F    | GAGCCTTACAACGCTACTCTGTCTGTC |
| <i>AT5G62690</i>     | TUB_qRT_R    | ACACCAGACATAGTAGCAGAAATCAAG |
| <b><i>DREB2d</i></b> | DREB2d_qRT_F | GAGCCTTACAACGCTACTCTGTCTGTC |
| <i>AT1G75490</i>     | DREB2d_qRT_R | ACACCAGACATAGTAGCAGAAATCAAG |

---

### Oligonucleotides used for ChIP-qPCR

---

|                    |         |                          |
|--------------------|---------|--------------------------|
| <b><i>EIN3</i></b> | EIN3_F1 | TCCATTCAAAGGGACAGGGA     |
| <i>AT3G20770</i>   | EIN3_R1 | AGACTGATGGAAATAAAGGCGGA  |
|                    | EIN3_F2 | CTAGCTGAGCATGTAGAACAGGT  |
|                    | EIN3_R2 | GTAGTCCACCTGAAACCACCA    |
|                    | EIN3_NF | CACGCAATGACGCAAATCCT     |
|                    | EIN3_NR | CACTCGACCTCGTGAACACA     |
| <b><i>EOL1</i></b> | EOL1_F1 | TTGCTAAGAGCTAGTTCCCCA    |
| <i>AT3G42660</i>   | EOL1_R1 | CACTTTGGCTCTGGCTTTTGT    |
|                    | EOL1_F2 | GAGAAGCGGTGATGCCAAGA     |
|                    | EOL1_R2 | GAA CACTTCCCTTTGGACACA   |
|                    | EOL1_F3 | AGGTTAGGGTTTGGTCGAGA     |
|                    | EOL1_R3 | ACCACTTATGTACAGCTGACGG   |
|                    | EOL1_NF | AACATGGGCTTAGATGGGCTT    |
|                    | EOL1_NR | AGGGAAGAACTAGATCATTTGAGG |
| <b><i>ETO1</i></b> | ETO1_F1 | CTCAGCTCGCTTCACTTGAG     |
| <i>AT3G51770</i>   | ETO1_R1 | GTAGACGTGTGCAGCCGAG      |
|                    | ETO1_F2 | TCTCACCCACATGACCATACG    |
|                    | ETO1_R2 | TAAGTCTAATCACTGCTGAGTGG  |
|                    | ETO1_NF | TTCCCTCCTGGTATGGCTTC     |
|                    | ETO1_NR | TGGCTATGCTTGTCTTTTCCC    |

---

### Oligonucleotides used for genotyping

---

|                                  |           |                                   |
|----------------------------------|-----------|-----------------------------------|
| <i>hsfa7a</i><br>(SALK_080138)   | hsfa7a_LP | GTTCCAGAAGCAAGTTTCGTG             |
|                                  | hsfa7a_RP | TTGCTCACTCATGTGGACTTG             |
|                                  | LBb1.3    | ATTTTGCCGATTTTCGGAAC              |
| <i>hsfa7b-1</i><br>(GABI_498E08) | hsfa7b_LP | AAACTCCCATCTCTCTGCCTC             |
|                                  | hsfa7b_RP | CCACCAGCAAAAGCAGAGTAC             |
|                                  | LB3       | TAGCATCTGAATTCATAACCAATCTCGATACAC |
| <i>hsfa7b-2</i><br>(SALK_152004) | hsfa7b_LP | TTCTTCGCAAGTTCTGGAAAC             |
|                                  | hsfa7b_RP | TCCCATTTTATAAGATTTTCAAGC          |
|                                  | LBb1.3    | ATTTTGCCGATTTTCGGAAC              |
| <i>erf1a</i><br>(SALK_036267)    | erf1a_LP  | CGTTCCTAACCAAACCCTAGC             |

|                               |          |                          |
|-------------------------------|----------|--------------------------|
| <i>erf11</i><br>(SALK_116053) | erf1a_RP | TCCTACTCTTCTCCCTGCTCC    |
|                               | LBb1.3   | ATTTTGCCGATTCGGAAC       |
|                               | erf11_LP | CCACACGTCGTCCTTCATATC    |
|                               | erf11_RP | TGCAAAGCCTAAAATTA AAAACG |
|                               | LBb1.3   | ATTTTGCCGATTCGGAAC       |

---
